# Supplementary material for: Epigenetically regulated digital signaling defines epithelial innate immunity at the tissue level
Source: PubMed Central journal article supplement (PMC7988009; doi:10.1038/s41467-021-22070-x), 2021-03-23
Supplement: 41467_2021_22070_MOESM1_ESM.pdf [file 41467_2021_22070_MOESM1_ESM.pdf]

# **Epigenetically Regulated Digital Signaling Defines Epithelial Innate Immunity at the Tissue Level**

Helen R. Clark, Connor McKenney, Nathan M. Livingston, Ariel Gershman, Seema Sajjan, Isaac S. Chan, Andrew J. Ewald, Winston Timp, Bin Wu, Abhyudai Singh, Sergi Regot

## **SUPPLEMENTARY INFORMATION**

### **SUPPLEMENTARY FIGURES**

Supplementary Figure 1. Reporter Parameters vs. Ratio Parameters Correlation Analysis and Adaptor Knockouts.

Supplementary Figure 2. Monolayers have bimodal response to lipopeptide

Supplementary Figure 3. Clonal expansion and combined inputs.

Supplementary Figure 4. Digital signaling in fibroblast, endothelial, and primary cells.

Supplementary Figure 5. Complete lineage tracing and epigenetic inhibitors Pam response amplitudes.

Supplementary Figure 6. Pam response MyD88 dependence, smFISH supporting data, TLR2 protein turnover quantification.

Supplementary Figure 7. Whole genome nanopore methylation sequencing data of select receptors.

Supplementary Figure 8. TLR2 co-receptor expression and NF- $\kappa$ B amplitude of BRAFV600E monolayers

### **SUPPLEMENTARY TABLES**

Supplementary Table 1. ScRNA GO Analysis of TLR2 Positive Human Mammary Luminal Cells

### **SUPPLEMENTARY NOTES**

Supplementary Model

# Supplementary Figure 1

## Reporter Parameters vs. Ratio Parameters Correlation Analysis and Adaptor Knockouts

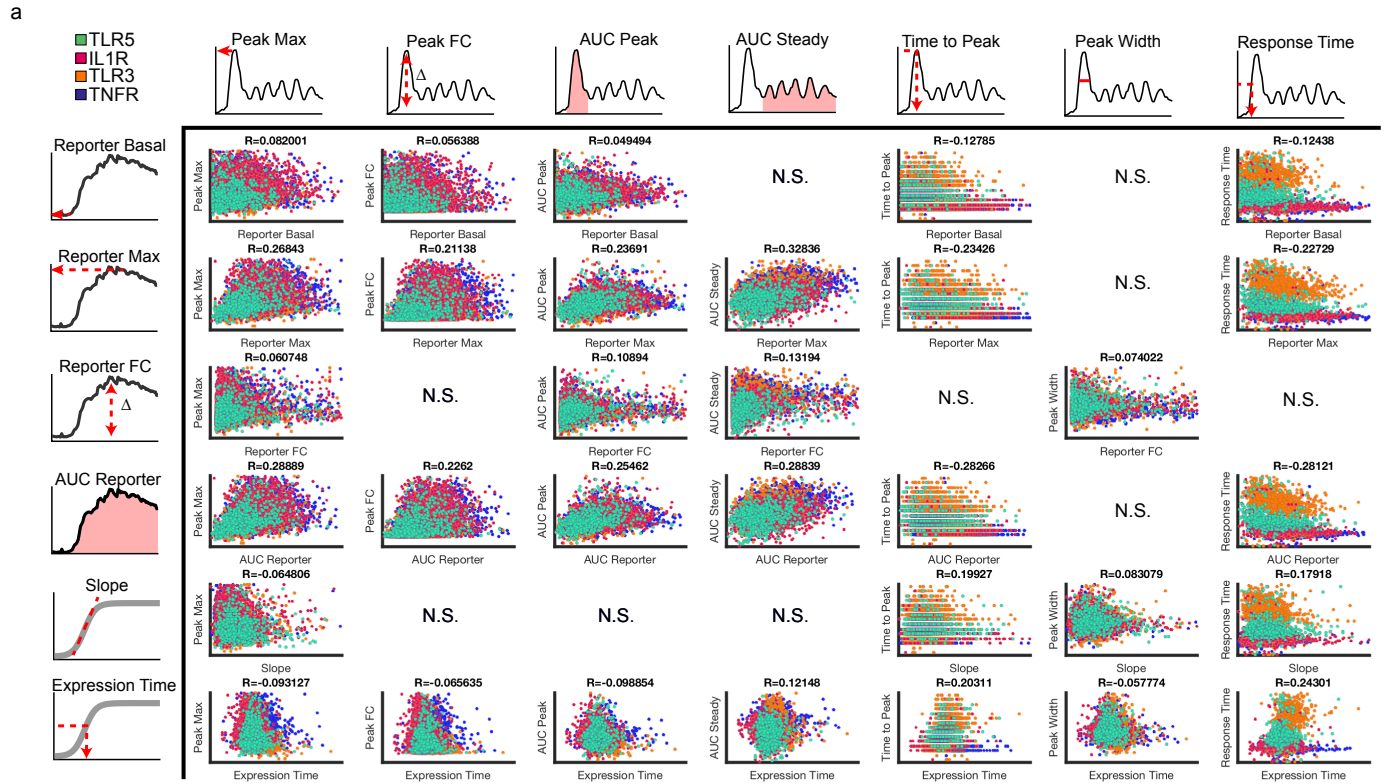

N.S = Not Significant

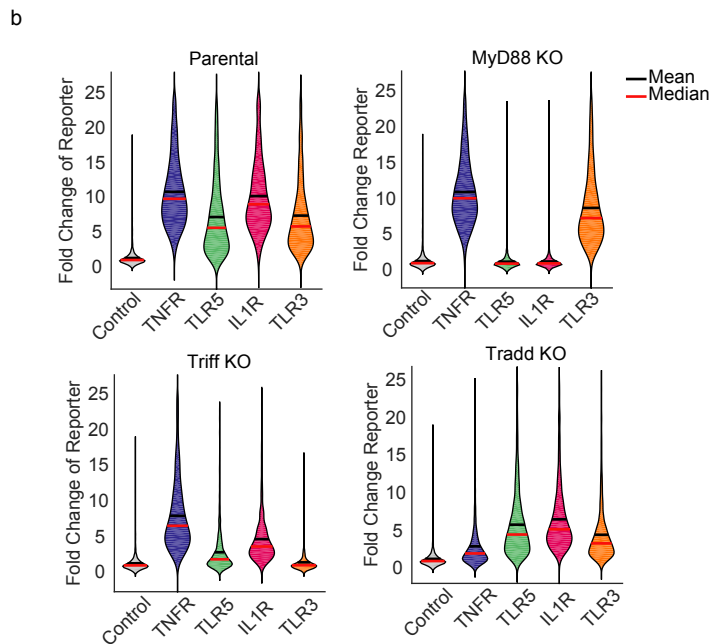

Supplementary Figure 1. Reporter Parameters vs. Ratio Parameters Correlation Analysis and Adaptor Knockouts. (a) Reporter vs. ratio parameters correlation analysis. Scatterplots and correlation coefficients between the parameters that are summarized in the corresponding diagrams. Only those with  $p < 0.001$  are shown, plots with  $p$  values that were not significant are indicated with N.S. (b) Crispr knockouts of adaptors involved in the NF- $\kappa$ B network (see Fig. 1d). Violin plots show the fold change in reporter from the average of the first five time points to the last five timepoints over a four hour time course after addition of media (control) or inputs that activate the labeled receptors: 100 ng/ml TNF $\alpha$  (TNFR), 1  $\mu$ g/ml flagellin (TLR5), 100 ng/ml IL-1 $\beta$  (IL1R), 20  $\mu$ g/ml Poly(I:C) (TLR3).

## Supplementary Figure 2

Monolayers have bimodal response to lipopeptide

a

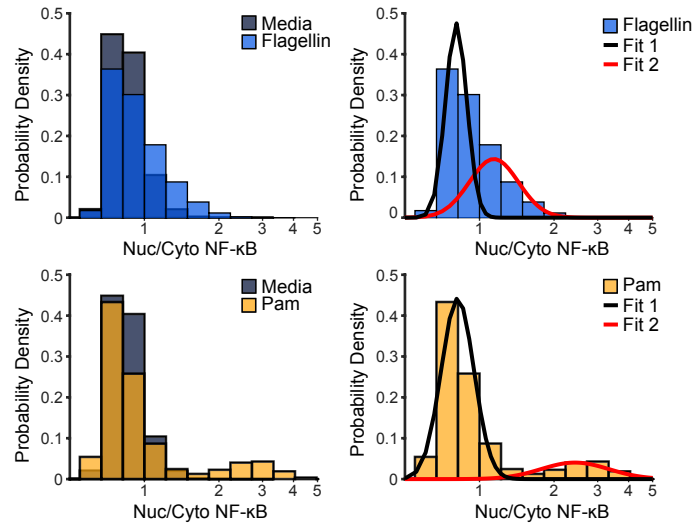

b

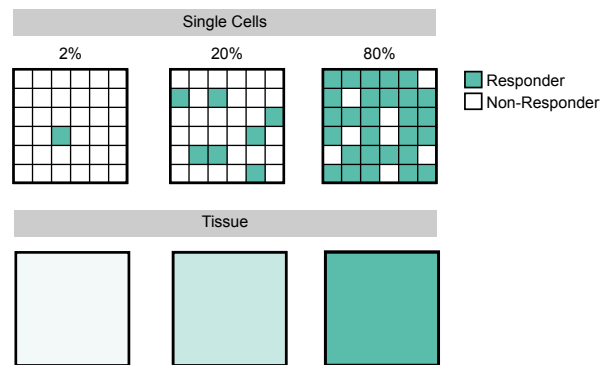

Supplementary Figure 2. Monolayers have bimodal response to lipopeptide (a) Histograms show quantification of the nuclear/cytoplasmic NF-κB response after 1 μg/ml flagellin or 1 μg/ml Pam3CSK4 and were fit to a two-gaussian model. The entropy for two-gaussian fit was 0.42 for flagellin and Pam3CSK4 was 0.04. (b) Schematic showing rationale behind controlling tissue level response by licensing response in single cells. In theory this type of regulatory mechanism would mitigate biological noise from single cells.

### Supplementary Figure 3

Clonal expansion and combined inputs

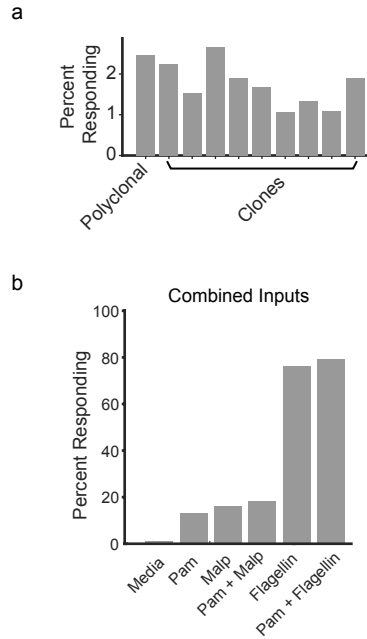

Supplementary Figure 3. Clonal expansion and combined inputs. (a) Percent responders in clones derived from the NF- $\kappa$ B reporter MCF10A cell line. To determine steady state response, clones were cultured for 30 days before percent responders was determined by treatment with 30 minutes 1  $\mu$ g/ml Pam3CSK4 and NF- $\kappa$ B immunofluorescence. (b) Monolayers were either treated with single inputs or inputs that were combined prior to treatment (1  $\mu$ g/ml Pam3CSK4, 1  $\mu$ g/ml MALP, 1  $\mu$ g/ml flagellin), and were immunostained for NF- $\kappa$ B response.

## Supplementary Figure 4

Digital signaling in various cell types

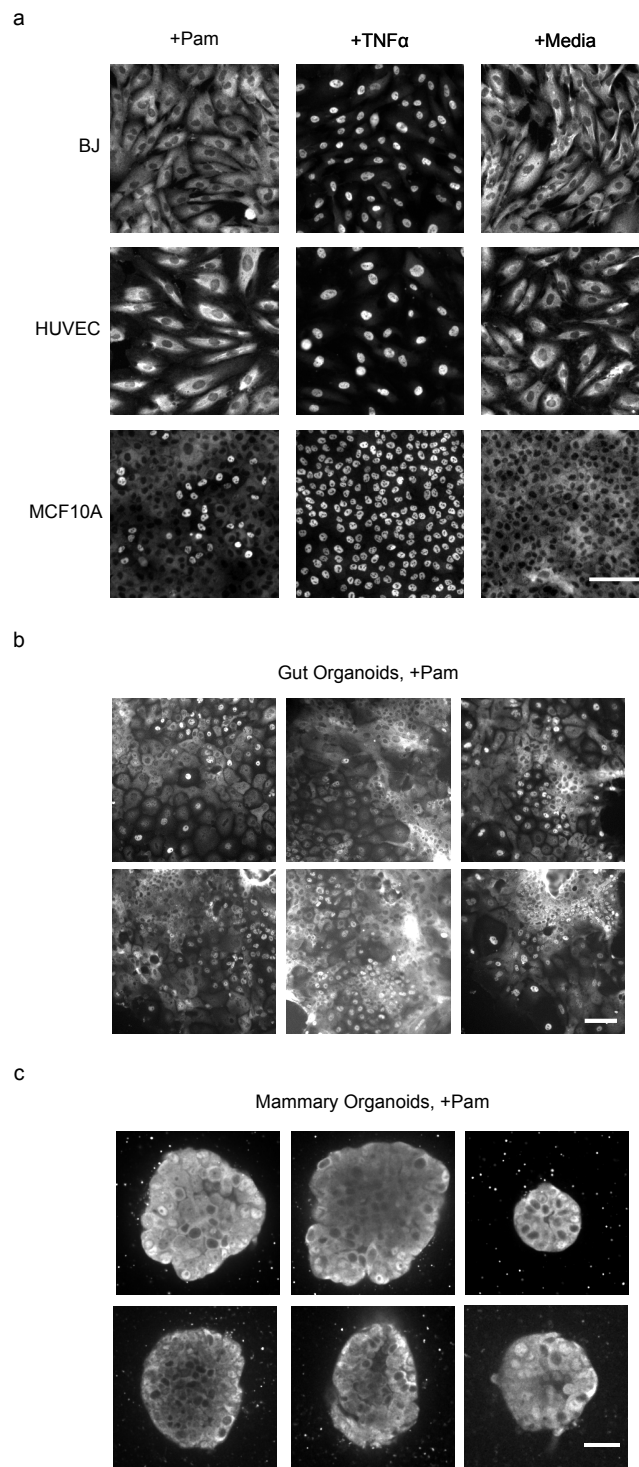

Supplementary Figure 4. Digital signaling in fibroblast, endothelial, and primary cells. (a) BJ, HUVECs and MCF10A were treated with 1  $\mu\text{g/ml}$  Pam3CSK4, 100 ng/ml TNF $\alpha$ , or media, fixed and stained for NF- $\kappa\text{B}$  to determine nuclear translocation. TNF $\alpha$  was added 20 minutes prior to fixation while Pam3CSK4 was 30. Scale bar, 100  $\mu\text{m}$ . (b) Gut monolayers were isolated from mouse and grown in 2D on matrigel prior to treatment with 10  $\mu\text{g/ml}$  Pam3CSK4 and immunofluorescent staining for NF- $\kappa\text{B}$  translocation. Scale bar, 100  $\mu\text{m}$ . (c) Mammary organoids isolated from mice were embedded in matrigel and grown in 3D prior to treatment with 10  $\mu\text{g/ml}$  Pam3CSK4 and immunofluorescent staining for NF- $\kappa\text{B}$  translocation. Scale bar, 10  $\mu\text{m}$ .

## Supplementary Figure 5

Complete lineage tracing and epigenetic inhibitors pam response amplitudes

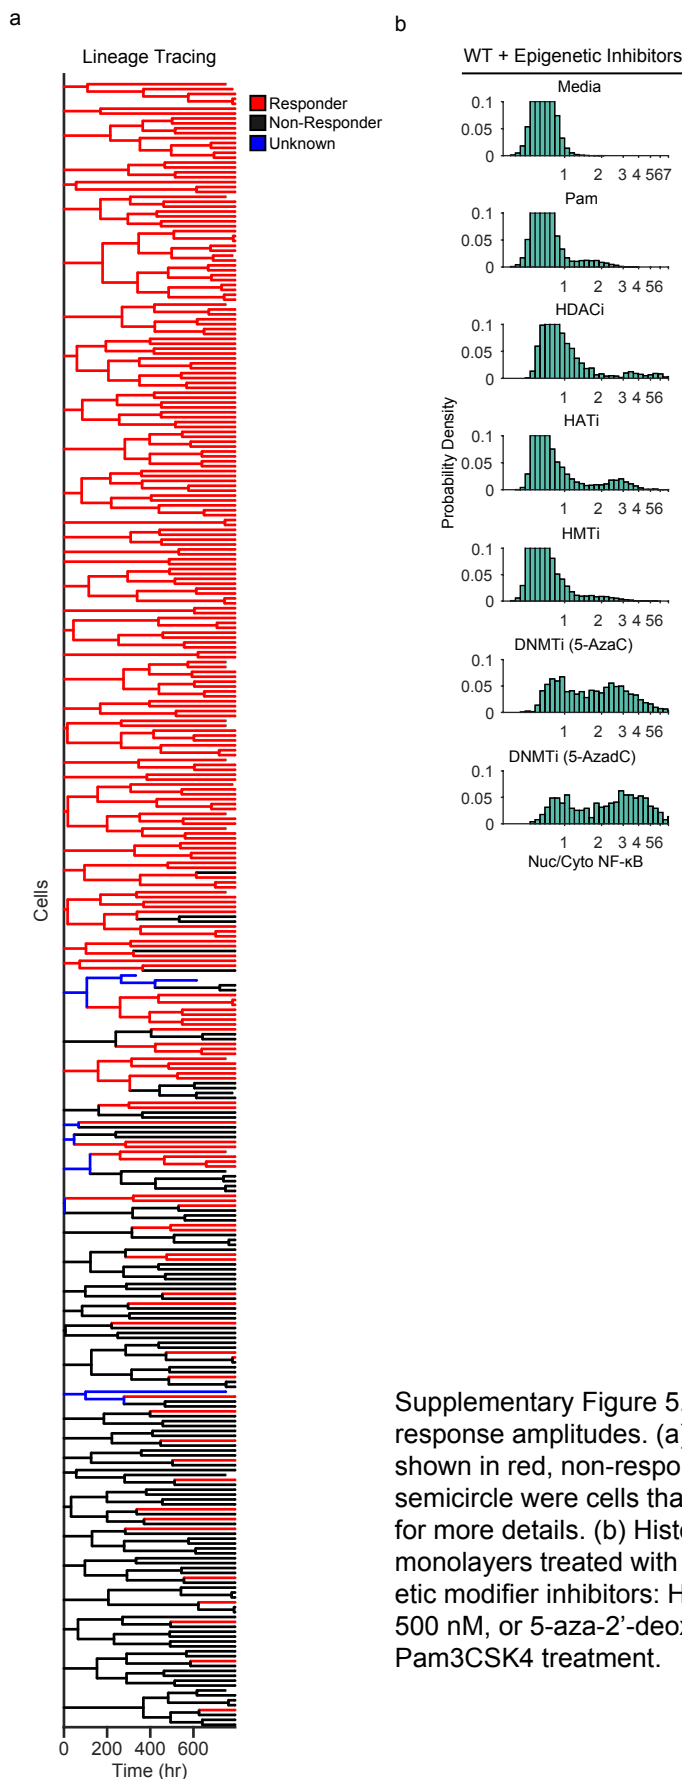

Supplementary Figure 5. Complete lineage tracing and epigenetic inhibitors pam response amplitudes. (a) Complete lineage tracing experiment. Responders are shown in red, non-responders in black, unknown in blue. Traces that end in a grey semicircle were cells that either died or moved out of the field of view. See methods for more details. (b) Histograms of nuclear/cytoplasmic NF- $\kappa$ B response in WT monolayers treated with media, Pam3CSK4 alone, or were cultured with epigenetic modifier inhibitors: HDACi (SAHA 800 nM), DNMT inhibitors (5-AzacytidineC, 500 nM, or 5-aza-2'-deoxycytidine, 1  $\mu$ M) HATi (A-485, 10  $\mu$ M), for a week prior to Pam3CSK4 treatment.

## Supplementary Figure 6

Pam response MyD88 dependence, smFISH supporting data, TLR2 protein turnover quantification

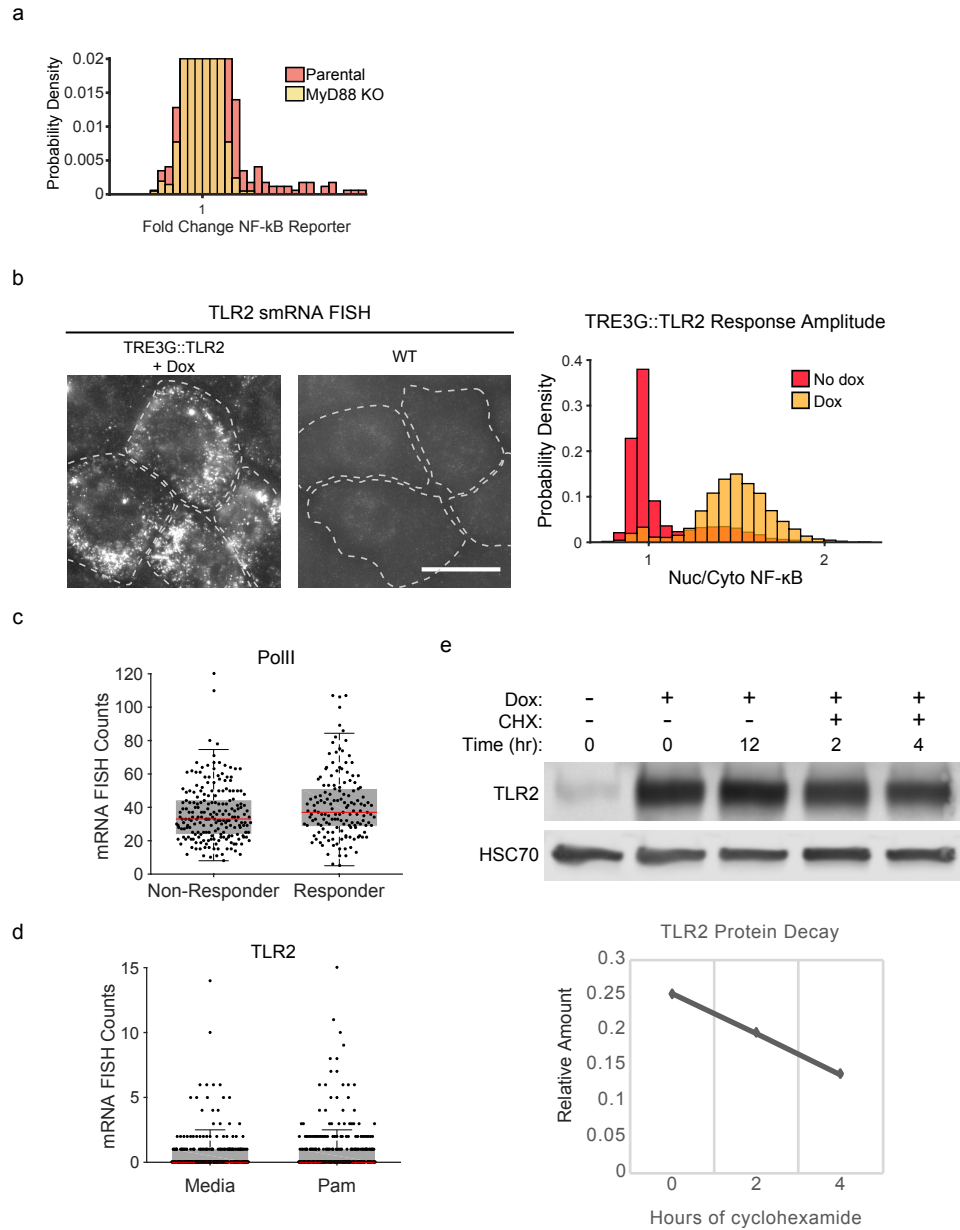

Supplementary Figure 6. Pam response MyD88 dependence, smFISH supporting data, TLR2 protein turnover quantification. (a) NF- $\kappa$ B reporter cell line MCF10A monolayers and the same cell line with MyD88 Crispr deletion were treated with 1  $\mu$ g/ml Pam3CSK4. The fold change of the reporter from the average of the first five time points to the last five timepoints over a four hour time course was determined for each cell. (b) smFISH for TLR2 in 24 hour dox (2  $\mu$ g/ml) treated tet inducible TLR2 cells and WT cells. Histogram shows amplitude of Pam3CSK4 response in tet inducible TLR2 cells after 24 hours of dox (2  $\mu$ g/ml) (dox n= 6419 cells no dox n= 7058 cells) . (c) Quantification of mRNA FISH puncta for PolII in Non-Responder and Responder cells as determined by NF- $\kappa$ B immunofluorescence. (d) Quantification of TLR2 mRNA FISH puncta in Pam3CSK4 treated and untreated cells. (e) Immunoblot for TLR2 after overnight dox (2  $\mu$ g/ml) treatment in tet inducible TLR2 cell line. Before lysate collection, monolayers were treated with or without 20  $\mu$ g/ml cyclohexamide (CHX) for the indicated number of hours. Quantification of protein relative to HSC70 loading control is shown below.

## Supplementary Figure 7

### Whole genome nanopore methylation sequencing

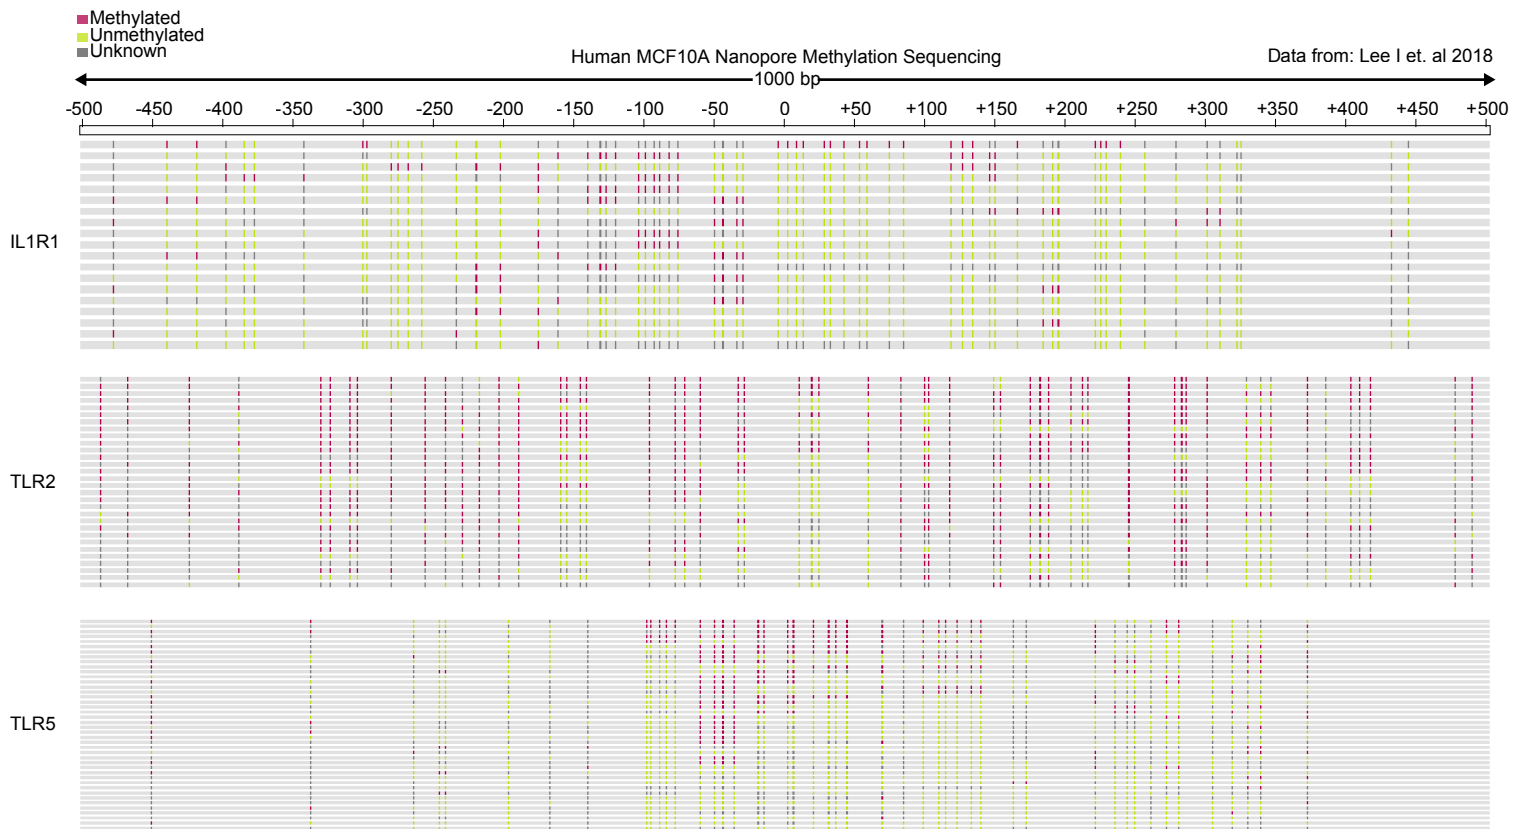

Supplementary Figure 7. Whole genome nanopore methylation sequencing data of select receptors, DNA isolated from MCF10A cells. Data was obtained from Lee I et. al 2018.



Supplementary Figure 8

TLR2 co-receptor expressions NF-κB amplitude of BRAFV600E monolayers

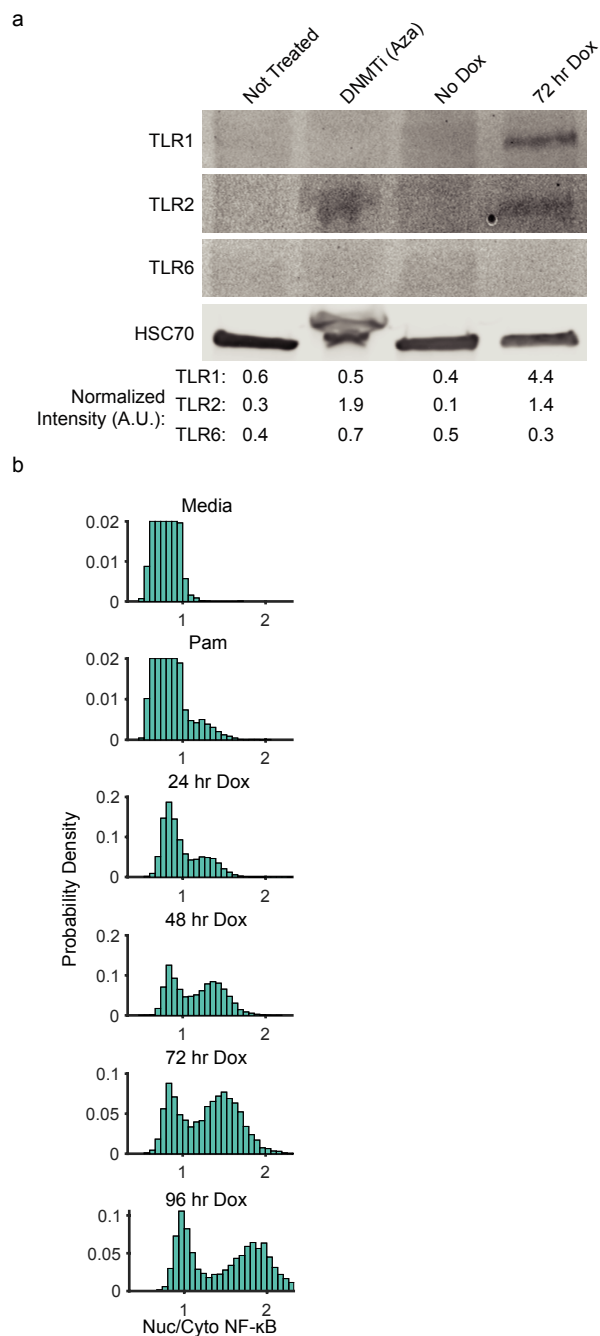

Supplementary Figure 8. TLR2 co-receptor expression and NF-κB amplitude of BRAFV600E monolayers (a) Immunoblot for TLR1, TLR2, TLR6 after DNMTi (5-AzacytidineC, 500 nM) or 72hr dox (2 μg/ml) treatment. Quantification of protein is normalized to HSC70 loading control. (b) Tet inducible BRAFV600E monolayers were treated with media, 1 μg/ml Pam3CSK4 alone, or with increasing durations of doxycycline (2 μg/ml). Histograms show NF-κB nuclear/cytoplasmic amplitude, n > 5000 cells per condition.

## Supplementary Table 1

## ScRNA GO Analysis of TLR2 Positive Human Mammary Luminal Cells

Analysis Type: PANTHER Overrepresentation Test (Released 20200407)  
 Annotation Version and Release Date: GO Ontology database DOI: 10.5281/zenodo.3727280 Released 2020-03-23  
 Analyzed List: TLR2 (Homo sapiens)  
 Reference List: Homo sapiens (all genes in database)  
 Test Type: FISHER  
 Correction: FDR

| GO database hit                                                       | REFLIST (20851) | 34 | Expected | Over/under | Fold Enrichment | Raw P-Value | FDR      |
|-----------------------------------------------------------------------|-----------------|----|----------|------------|-----------------|-------------|----------|
| iron import into cell (GO:0033212)                                    | 6               | 2  | 0.01     | +          | > 100           | 7.16E-05    | 0.0254   |
| cobalt ion transport (GO:0006824)                                     | 7               | 2  | 0.01     | +          | > 100           | 9.19E-05    | 0.0312   |
| response to mycotoxin (GO:0010046)                                    | 7               | 2  | 0.01     | +          | > 100           | 9.19E-05    | 0.0306   |
| sequestering of iron ion (GO:0097577)                                 | 7               | 2  | 0.01     | +          | > 100           | 9.19E-05    | 0.03     |
| response to folic acid (GO:0051593)                                   | 10              | 2  | 0.02     | +          | > 100           | 0.000168    | 0.0497   |
| negative regulation of osteoclast differentiation (GO:0045671)        | 29              | 3  | 0.05     | +          | 63.44           | 1.89E-05    | 0.00863  |
| iron ion transport (GO:0006826)                                       | 74              | 5  | 0.12     | +          | 41.44           | 1.74E-07    | 0.000252 |
| cellular iron ion homeostasis (GO:0006879)                            | 66              | 4  | 0.11     | +          | 37.17           | 4.97E-06    | 0.00265  |
| iron ion homeostasis (GO:0055072)                                     | 83              | 5  | 0.14     | +          | 36.94           | 2.99E-07    | 0.000341 |
| negative regulation of myeloid leukocyte differentiation (GO:0002124) | 51              | 3  | 0.08     | +          | 36.07           | 9.24E-05    | 0.0295   |
| transition metal ion transport (GO:0000041)                           | 124             | 6  | 0.2      | +          | 29.67           | 6.04E-08    | 0.000964 |
| negative regulation of leukocyte differentiation (GO:1902106)         | 103             | 4  | 0.17     | +          | 23.82           | 2.68E-05    | 0.0113   |
| transition metal ion homeostasis (GO:0055076)                         | 132             | 5  | 0.22     | +          | 23.23           | 2.7E-06     | 0.00187  |
| cellular transition metal ion homeostasis (GO:0046916)                | 109             | 4  | 0.18     | +          | 22.51           | 3.32E-05    | 0.0136   |
| regulation of myeloid leukocyte differentiation (GO:0002761)          | 122             | 4  | 0.2      | +          | 20.11           | 5.09E-05    | 0.0193   |
| negative regulation of hemopoiesis (GO:1903707)                       | 143             | 4  | 0.23     | +          | 17.15           | 9.27E-05    | 0.029    |
| negative regulation of endopeptidase activity (GO:0010951)            | 252             | 6  | 0.41     | +          | 14.6            | 3.37E-06    | 0.00207  |
| negative regulation of peptidase activity (GO:0010466)                | 262             | 6  | 0.43     | +          | 14.04           | 4.2E-06     | 0.00239  |
| neutrophil degranulation (GO:0043312)                                 | 482             | 9  | 0.79     | +          | 11.45           | 6.34E-08    | 0.000506 |
| neutrophil activation involved in immune response (GO:0002283)        | 486             | 9  | 0.79     | +          | 11.36           | 6.8E-08     | 0.000362 |
| neutrophil mediated immunity (GO:0002446)                             | 493             | 9  | 0.8      | +          | 11.2            | 7.66E-08    | 0.000306 |
| neutrophil activation (GO:0042119)                                    | 495             | 9  | 0.81     | +          | 11.15           | 7.92E-08    | 0.000253 |
| granulocyte activation (GO:0036230)                                   | 500             | 9  | 0.82     | +          | 11.04           | 8.62E-08    | 0.000229 |
| leukocyte degranulation (GO:0043299)                                  | 504             | 9  | 0.82     | +          | 10.95           | 9.21E-08    | 0.00021  |
| myeloid leukocyte mediated immunity (GO:0002444)                      | 514             | 9  | 0.84     | +          | 10.74           | 1.09E-07    | 0.000217 |
| myeloid cell activation involved in immune response (GO:000227)       | 519             | 9  | 0.85     | +          | 10.63           | 1.18E-07    | 0.000209 |
| negative regulation of proteolysis (GO:0045861)                       | 360             | 6  | 0.59     | +          | 10.22           | 2.47E-05    | 0.0107   |
| myeloid leukocyte activation (GO:0002274)                             | 583             | 9  | 0.95     | +          | 9.47            | 3.1E-07     | 0.000329 |
| leukocyte activation involved in immune response (GO:0002366)         | 619             | 9  | 1.01     | +          | 8.92            | 5.08E-07    | 0.000477 |
| cell activation involved in immune response (GO:0002263)              | 623             | 9  | 1.02     | +          | 8.86            | 5.36E-07    | 0.000475 |
| regulation of endopeptidase activity (GO:0052548)                     | 425             | 6  | 0.69     | +          | 8.66            | 6.15E-05    | 0.0223   |
| regulation of peptidase activity (GO:0052547)                         | 455             | 6  | 0.74     | +          | 8.09            | 8.91E-05    | 0.0309   |
| leukocyte mediated immunity (GO:0002443)                              | 762             | 10 | 1.24     | +          | 8.05            | 2.63E-07    | 0.000323 |
| negative regulation of hydrolase activity (GO:0051346)                | 461             | 6  | 0.75     | +          | 7.98            | 9.57E-05    | 0.0294   |
| regulated exocytosis (GO:0045055)                                     | 696             | 9  | 1.13     | +          | 7.93            | 1.33E-06    | 0.000965 |
| exocytosis (GO:0006887)                                               | 788             | 10 | 1.28     | +          | 7.78            | 3.57E-07    | 0.000356 |
| leukocyte activation (GO:0045321)                                     | 921             | 11 | 1.5      | +          | 7.32            | 1.47E-07    | 0.000234 |
| cell activation (GO:0001775)                                          | 1068            | 11 | 1.74     | +          | 6.32            | 6.34E-07    | 0.000533 |
| immune effector process (GO:0002252)                                  | 1083            | 11 | 1.77     | +          | 6.23            | 7.27E-07    | 0.000581 |
| secretion by cell (GO:0032940)                                        | 1002            | 10 | 1.63     | +          | 6.12            | 3.09E-06    | 0.00205  |
| cellular response to cytokine stimulus (GO:0071345)                   | 1031            | 10 | 1.68     | +          | 5.95            | 3.97E-06    | 0.00235  |
| export from cell (GO:0140352)                                         | 1049            | 10 | 1.71     | +          | 5.85            | 4.63E-06    | 0.00255  |
| secretion (GO:0046903)                                                | 1119            | 10 | 1.82     | +          | 5.48            | 8.16E-06    | 0.00407  |
| response to cytokine (GO:0034097)                                     | 1121            | 10 | 1.83     | +          | 5.47            | 8.29E-06    | 0.00401  |
| ion transport (GO:0006811)                                            | 1342            | 10 | 2.19     | +          | 4.57            | 3.91E-05    | 0.0152   |
| establishment of localization in cell (GO:0051649)                    | 2387            | 16 | 3.89     | +          | 4.11            | 2.58E-07    | 0.000343 |
| immune response (GO:0006955)                                          | 1872            | 12 | 3.05     | +          | 3.93            | 2.33E-05    | 0.0103   |
| vesicle-mediated transport (GO:0016192)                               | 1944            | 12 | 3.17     | +          | 3.79            | 3.39E-05    | 0.0135   |
| cellular localization (GO:0051641)                                    | 2999            | 17 | 4.89     | +          | 3.48            | 9.81E-07    | 0.000746 |
| cellular response to organic substance (GO:0071310)                   | 2400            | 13 | 3.91     | +          | 3.32            | 5.59E-05    | 0.0208   |
| immune system process (GO:0002376)                                    | 2778            | 15 | 4.53     | +          | 3.31            | 1.13E-05    | 0.00532  |
| transport (GO:0006810)                                                | 4550            | 20 | 7.42     | +          | 2.7             | 3.33E-06    | 0.00212  |
| establishment of localization (GO:0051234)                            | 4680            | 20 | 7.63     | +          | 2.62            | 5.26E-06    | 0.00271  |
| localization (GO:0051179)                                             | 5802            | 20 | 9.46     | +          | 2.11            | 0.000166    | 0.05     |
| MHC class II protein complex (GO:0042613)                             | 19              | 2  | 0.03     | +          | 64.55           | 0.00053     | 0.0425   |
| tertiary granule lumen (GO:1904724)                                   | 55              | 4  | 0.09     | +          | 44.6            | 2.5E-06     | 0.000502 |
| specific granule lumen (GO:0035580)                                   | 62              | 4  | 0.1      | +          | 39.57           | 3.93E-06    | 0.000717 |
| ER to Golgi transport vesicle membrane (GO:0012507)                   | 61              | 3  | 0.1      | +          | 30.16           | 0.000153    | 0.0162   |
| filicolin-1-rich granule (GO:0101002)                                 | 124             | 4  | 0.2      | +          | 19.78           | 5.41E-05    | 0.00776  |
| filicolin-1-rich granule lumen (GO:1904813)                           | 124             | 4  | 0.2      | +          | 19.78           | 5.41E-05    | 0.00724  |
| COPII-coated ER to Golgi transport vesicle (GO:0030134)               | 94              | 3  | 0.15     | +          | 19.57           | 0.000524    | 0.0438   |
| secretory granule lumen (GO:0034774)                                  | 320             | 8  | 0.52     | +          | 15.33           | 4.32E-08    | 1.24E-05 |
| specific granule (GO:0042581)                                         | 160             | 4  | 0.26     | +          | 15.33           | 0.000141    | 0.0158   |
| cytoplasmic vesicle lumen (GO:0060205)                                | 324             | 8  | 0.53     | +          | 15.14           | 4.75E-08    | 1.19E-05 |
| vesicle lumen (GO:0031983)                                            | 326             | 8  | 0.53     | +          | 15.05           | 4.97E-08    | 1.11E-05 |
| tertiary granule (GO:0070820)                                         | 164             | 4  | 0.27     | +          | 14.96           | 0.000155    | 0.0156   |
| secretory granule (GO:0030141)                                        | 849             | 9  | 1.38     | +          | 6.5             | 6.64E-06    | 0.00111  |
| extracellular exosome (GO:0070062)                                    | 2098            | 22 | 3.42     | +          | 6.43            | 2.06E-14    | 2.06E-11 |
| extracellular vesicle (GO:1903561)                                    | 2119            | 22 | 3.46     | +          | 6.37            | 2.52E-14    | 1.69E-11 |
| extracellular organelle (GO:0043230)                                  | 2124            | 22 | 3.46     | +          | 6.35            | 2.65E-14    | 1.33E-11 |
| lytic vacuole (GO:0000323)                                            | 708             | 7  | 1.15     | +          | 6.06            | 0.000128    | 0.0161   |
| lysosome (GO:0005764)                                                 | 708             | 7  | 1.15     | +          | 6.06            | 0.000128    | 0.0152   |
| secretory vesicle (GO:0099503)                                        | 1017            | 9  | 1.66     | +          | 5.43            | 2.77E-05    | 0.00428  |
| vacuole (GO:0005773)                                                  | 809             | 7  | 1.32     | +          | 5.31            | 0.000289    | 0.0252   |
| extracellular space (GO:0005615)                                      | 3349            | 26 | 5.46     | +          | 4.76            | 1.15E-14    | 2.31E-11 |
| extracellular region (GO:0005576)                                     | 4381            | 27 | 7.14     | +          | 3.78            | 5.96E-13    | 2.39E-10 |
| vesicle (GO:0031982)                                                  | 3893            | 23 | 6.35     | +          | 3.62            | 5.94E-10    | 1.99E-07 |
| cytoplasmic vesicle (GO:0031410)                                      | 2397            | 12 | 3.91     | +          | 3.07            | 0.000257    | 0.0246   |
| intracellular vesicle (GO:0097708)                                    | 2400            | 12 | 3.91     | +          | 3.07            | 0.00026     | 0.0238   |
| Metal sequestration by antimicrobial proteins (R-HSA-6799990)         | 6               | 2  | 0.01     | +          | > 100           | 7.16E-05    | 0.0234   |
| Peptide chain elongation (R-HSA-156902)                               | 89              | 4  | 0.15     | +          | 27.56           | 1.54E-05    | 0.00881  |
| Eukaryotic Translation Elongation (R-HSA-156842)                      | 94              | 4  | 0.15     | +          | 26.1            | 0.000019    | 0.00867  |
| Neutrophil degranulation (R-HSA-6798695)                              | 478             | 9  | 0.78     | +          | 11.55           | 5.91E-08    | 0.000135 |
| Infectious disease (R-HSA-5663205)                                    | 465             | 6  | 0.76     | +          | 7.91            | 0.0001      | 0.0286   |
| Innate Immune System (R-HSA-168249)                                   | 1105            | 10 | 1.8      | +          | 5.55            | 7.31E-06    | 0.00556  |
| Disease (R-HSA-1643685)                                               | 1127            | 9  | 1.84     | +          | 4.9             | 6.15E-05    | 0.0234   |
| Immune System (R-HSA-168256)                                          | 2159            | 14 | 3.52     | +          | 3.98            | 3.1E-06     | 0.00353  |

## SUPPLEMENTARY NOTES

We consider a model where single cells reversibly switch between two states – responder and non-responder. Starting from a single cell, the lineage expansion is assumed to occur exponentially with rate  $\lambda$ , i.e., the average number of cells in a lineage at time  $t$  is  $e^{\lambda t}$ . During the lineage expansion, the mother cell state is inherited by both daughters. Let the switching rate from non-responder to responder be  $k_{on}$ , and  $k_{off}$  be the switching rate from responder to non-responder. We define dimensionless switching rates

$$\hat{k}_{on} = \frac{k_{on}}{\lambda}, \quad \hat{k}_{off} = \frac{k_{off}}{\lambda}, \quad (1)$$

and in the limit  $\hat{k}_{on}, \hat{k}_{off} \ll 1$ , these dimensionless rates correspond to switching probabilities per generation. At equilibrium, the fraction of responders is given by

$$f = \frac{\hat{k}_{on}}{\hat{k}_{on} + \hat{k}_{off}} \quad (2)$$

and is assumed to be  $f = 15\%$ . Starting from a single responder cell at time  $t = 0$ , the fraction of responders during the lineage expansion varies as

$$p_r = f + (1 - f)e^{-(\hat{k}_{on} + \hat{k}_{off})T} \quad (3)$$

where  $T = \frac{t}{\lambda}$  denotes the time in number of generations. Similarly, starting from a non-responder, the fraction of responders at time  $T$  is

$$p_{nr} = f(1 - e^{-(\hat{k}_{on} + \hat{k}_{off})T}). \quad (4)$$

Having defined the modeling framework, we next consider lineage data across  $M$  independent lineages, each starting from a single cell that could either be a responder with probability  $f$ , or a non-responder with probability  $1-f$ . For each lineage  $i \in \{1, 2, \dots, M\}$ , the number of cells  $N_i$ , and the number of responders  $N_i^r$  are measured at the end of the experiment. Given the probability of being a responder as derived in (3)-(4), the likelihood of observing  $N_i^r$  responders out of  $N_i$  cells follows the binomial distribution

$$P(N_i^r | N_i) = f p_r^{N_i^r} (1 - p_r)^{N_i - N_i^r} + (1 - f) p_{nr}^{N_i^r} (1 - p_{nr})^{N_i - N_i^r} \quad (5)$$

where the first (second) term corresponds to the initial cell being a responder (non-responder).

We further condition this probability on having at least one responder

$$P(N_i^r | N_i, N_i^r \geq 1) = \frac{f p_r^{N_i^r} (1 - p_r)^{N_i - N_i^r} + (1 - f) p_{nr}^{N_i^r} (1 - p_{nr})^{N_i - N_i^r}}{1 - f (1 - p_r)^{N_i} - (1 - f) (1 - p_{nr})^{N_i}}. \quad (6)$$

This leads to the following likelihood function across all lineages

$$\prod_{i=1}^M P(N_i^r | N_i, N_i^r \geq 1)$$

which is maximized to obtain estimates of  $\hat{k}_{on}$ ,  $\hat{k}_{off}$  for a given fraction of responders  $f$  as per (2). To obtain 95% confidence intervals, we use bootstrapping where randomized lineage data is generated from the original data, and rates are estimated using maximum likelihood.
