# Supplementary material for: Epigenetically regulated digital signaling defines epithelial innate immunity at the tissue level
Source: PubMed Central journal article supplement (PMC7988009; doi:10.1038/s41467-021-22070-x), 2021-03-23
Supplement: 41467_2021_22070_MOESM2_ESM.pdf [file 41467_2021_22070_MOESM2_ESM.pdf]

## Description of Additional Supplementary Files

**Supplementary Movie 1:** NF- $\kappa$ B translocation and gene expression reporter. MCF10A reporter cell line was imaged for 50 minutes to establish a signaling baseline, then was treated with 100 ng/ml TNF $\alpha$  and imaged. NF- $\kappa$ B translocation reporter (p65-mRuby) is shown in grey, NF- $\kappa$ B gene expression reporter (Venus-PEST) in green.

**Supplementary Movie 2:** NF- $\kappa$ B gene expression reporter movies in tandem for all MAMP screen inputs as in Figure 1 e and g. MCF10A reporter cell line was treated with flagellin (100  $\mu$ g/ml), IL-1 $\beta$  (100 ng/ml), poly(I:C) (20  $\mu$ g/ml), TNF $\alpha$  (100 ng/ml), or Pam3CSK4 (1  $\mu$ g/ml) at time zero and imaged.
